# Supplementary material
Source: Springer Nature journal article supplement (https://www.springermedizin.de/resource/supplementary/12875_2013_1052_MOESM2_ESM.pdf/9436026)
Supplement: MOESM2 [file 9436026]

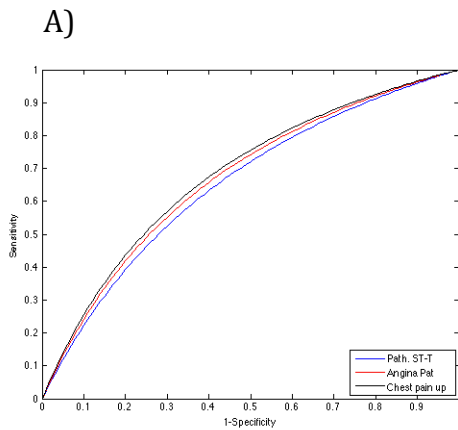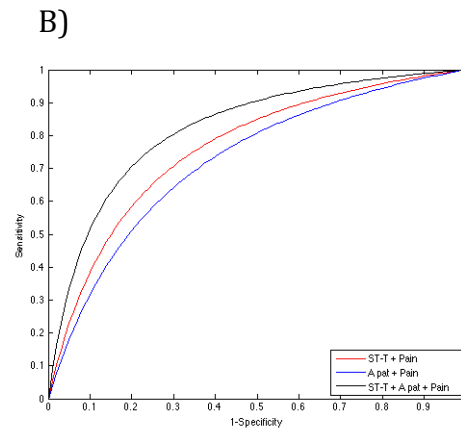

**Additional data, file 2 Theoretical simulation of receiver operating characteristic (ROC) curves from crude odds ratio (OR; A) and from combinations of adjusted OR (B)**

**Theoretical estimation of the area under the curve from crude OR**

|                                         |        |
|-----------------------------------------|--------|
| Pathologic ST-T segment on resting ECG: | 0.6534 |
| Angina according to patient:            | 0.6700 |
| Chest pain on exertion                  | 0.6804 |

**Theoretical estimation of the area under the curve from combinations of adjusted OR**

|                                                                         |        |
|-------------------------------------------------------------------------|--------|
| Pathologic ST-T + Chest pain on exertion:                               | 0.7622 |
| Angina according to patient+ Chest pain on exertion:                    | 0.7233 |
| Pathologic ST-T + Angina according to patient + Chest pain on exertion: | 0.8225 |

### Simulation of ROC curve and estimation of the area under the curve

An ROC curve with the corresponding area under the curve can be simulated by using the relations in a standard four-way table (Additional Table 1) for dichotomous evaluation of a marker compared to a clinical outcome. Using Table 1, the OR is

estimated as  $\frac{a*d}{b*c}$ .

### Additional Table 1 Standard presentation of the outcome from a marker compared to clinical outcome

|                  |   | Result of marker |   |
|------------------|---|------------------|---|
|                  |   | +                | - |
| Clinical outcome | + | a                | b |
|                  | - | c                | d |

Using the sensitivity,  $\frac{a}{a+b}$ , and the specificity,  $\frac{d}{c+d}$ , the OR can also be expressed

as  $OR = \frac{Sens/(1-Sens)}{(1-Spec)/Spec}$ . To simplify the equation, let  $y =$  sensitivity,  $x =$  specificity, and

$\mu = OR$ . The relation between OR and sensitivity and specificity can then be

expressed as  $\frac{y/(1-y)}{(1-x)/x} = \mu$ , which yields  $\frac{y}{1-y} = \frac{x}{1-x} * \mu$ .

The sensitivity,  $y$ , can now be expressed as  $y = \frac{\mu x}{\mu x - x + 1}$  or as

$$Sens = \frac{OR * Spec}{OR * Spec - Spec + 1}$$

This implies that for a fixed OR, the sensitivity can be estimated for any given value of the specificity, which means that a ROC curve can be constructed.

The area under the curve (AUC) can be estimated by integrating the expression above, given that  $\ln(\text{OR}) > 0$ :

$$\text{AUC} = \int_0^1 y \, dx = \int_0^1 \frac{\mu x}{\mu x - x + 1} \, dx = \dots = \frac{\mu(\mu - 1 - \ln(\mu))}{(\mu - 1)^2}$$

if  $\ln(\text{OR}) \sim 0 \Rightarrow \text{AUC} \sim 0.5$ .
